1 **AN INTERNATIONAL INTER-LABORATORY DIGITAL PCR STUDY DEMONSTRATES**  
2 **HIGH REPRODUCIBILITY FOR THE MEASUREMENT OF A RARE SEQUENCE VARIANT**

3 Alexandra S. Whale<sup>1</sup>, Alison S. Devonshire<sup>1</sup>, George Karlin-Neumann<sup>2</sup>, Jack Regan<sup>2</sup>, Leanne  
4 Javier<sup>2</sup>, Simon Cowen<sup>3</sup>, Ana Fernandez-Gonzalez<sup>1</sup>, Gerwyn M. Jones<sup>1</sup>, Nicholas Redshaw<sup>1</sup>,  
5 Julia Beck<sup>4</sup>, Andreas W. Berger<sup>5</sup>, Valérie Combaret<sup>6</sup>, Nina Dahl Kjersgaard<sup>7</sup> Lisa Davis<sup>8</sup>,  
6 Frederic Fina<sup>9</sup>, Tim Forshew<sup>10</sup>, Rikke Fredslund Andersen<sup>11</sup>, Silvia Galbiati<sup>12</sup>, Álvaro  
7 González Hernández<sup>13</sup>, Charles A. Haynes<sup>14</sup>, Filip Janku<sup>15</sup>, Roger Lacave<sup>16</sup>, Justin Lee<sup>17</sup>, Vilas  
8 Mistry<sup>18</sup>, Alexandra Pender<sup>19</sup>, Anne Pradines<sup>20</sup>, Charlotte Proudhon<sup>21</sup>, Lao Saal<sup>22</sup>, Elliot  
9 Stieglitz<sup>23</sup>, Bryan Ulrich<sup>24</sup>, Carole A. Foy<sup>1</sup>, Helen Parkes<sup>1</sup>, Svilen Tzonev<sup>2</sup> and Jim F.  
10 Huggett<sup>1,25\*</sup>

11 <sup>1</sup> Molecular and Cell Biology Team, LGC, Queens Road, Teddington, Middlesex TW11 0LY,  
12 UK

13 <sup>2</sup> Digital Biology Center, Bio-Rad Laboratories, 5731 West Las Positas, Pleasanton,  
14 California 94588, USA

15 <sup>3</sup> Statistics Team, LGC, Queens Road, Teddington, Middlesex TW11 0LY, UK

16 <sup>4</sup> Chronix Biomedical, Goetheallee 8, 37073 Goettingen, Germany

17 <sup>5</sup> Department of Internal Medicine I, Ulm University, Albert-Einstein-Allee 23, Ulm,  
18 Germany

19 <sup>6</sup> Laboratoire de Recherche Translationnelle, Centre Léon-Bérard, Lyon, France

20 <sup>7</sup> Sjællands Universitetshospital, Klinisk Biokemisk Afdeling, Molekylærenhed, Sygehusvej  
21 10, 4000 Roskilde, Denmark

22 <sup>8</sup> Genoptix Inc., 1811 Aston Avenue, Carlsbad, California 92008, USA

23 <sup>9</sup> Service de Transfert d'Oncologie Biologique, Laboratoire de Biologie Médicale, Faculte de  
24 médecine Nord, Boulevard Pierre Dramard, 13916 cedex 20 Marseille, France

25 <sup>10</sup> UCL Cancer Institute, Paul O'Gorman Building, 72 Huntley Street, London WC1E 6DD, UK

26 <sup>11</sup> Department of Clinical Immunology and Biochemistry, Vejle Hospital, Kabbelfoft 25,  
27 7100 Vejle, Denmark

28 <sup>12</sup> Division of Genetics and Cell Biology, IRCCS San Raffaele Scientific Institute, via Olgettina  
29 60, 20132 Milano, Italy

30 <sup>13</sup> Department of Pediatrics and CIMA LAB Diagnostics, Clínica Universidad de Navarra,  
31 Avenida Pío XII 36, 31008 Pamplona, Spain

32 <sup>14</sup> Michael Smith Laboratories, 301 Michael Smith Building, 2185 East Mall, University of  
33 British Columbia, Vancouver, BC V6T 1Z4, Canada

34 <sup>15</sup> The University of Texas MD Anderson Cancer Center; Department of Investigational  
35 Cancer Therapeutics (Phase I Clinical Trials Program), 1515 Holcombe Boulevard 0455,  
36 Houston, Texas 77030, USA

37 <sup>16</sup> Solid Tumours Genomics Unit, Tenon Hospital, APHP and Université Pierre et Marie  
38 Curie, 4 rue de la Chine, 75970 Paris, France

39 <sup>17</sup> Johns Hopkins, 1650 Orleans St, Baltimore, Maryland 21287, USA

40 <sup>18</sup> Department of Cancer Studies, University of Leicester, Robert Kilpatrick Clinical Sciences  
41 Building, Leicester Royal Infirmary, Leicester LE2 7LX, UK

42 <sup>19</sup> Lung Cancer Group, Division of Molecular Pathology, The Institute of Cancer Research,  
43 123 Old Brompton Road, London SW7 3RP, UK

44 <sup>20</sup> Institut Claudius Regaud – IUCTO, Laboratoire de Biologie Médicale Oncologique, 1  
45 avenue Irène Joliot-Curie, 31059 Toulouse cedex 9, France

46 <sup>21</sup> Institut Curie, PSL Research University, SiRIC, Laboratory of Circulating Tumor  
47 Biomarkers, 26 rue d'Ulm, 75005 Paris, France

48 <sup>22</sup> Department of Oncology and Pathology, Lund University, Scheelevägen 2, MV 404-B2, SE-  
49 22381, Lund, Sweden

50 <sup>23</sup> Department of Pediatrics, Benioff Children's Hospital, UCSF Helen Diller Family  
51 Comprehensive Cancer Center, 1450 Third Street, San Francisco, California 94158, USA

52 <sup>24</sup> Dana Farber Cancer Institute, Belfer Center for Applied Cancer Science and Department  
53 of Medical Oncology, Boston, Massachusetts 02115, USA

54 <sup>25</sup> School of Biosciences & Medicine, Faculty of Health & Medical Science, University of  
55 Surrey, Guildford, Surrey GU2 7XH, UK

56 \* Corresponding author: Jim Huggett, telephone: +44 (0)20 8943 7655, email:  
57 jim.huggett@lgcgroup.com.

58

59 **ABSTRACT**

60 This study tested the claim that digital PCR (dPCR) can offer highly reproducible  
61 quantitative measurements in disparate labs. Twenty-one laboratories measured four  
62 blinded samples containing different quantities of a *KRAS* fragment encoding G12D, an  
63 important genetic marker for guiding therapy of certain cancers. This marker is challenging  
64 to quantify reproducibly using qPCR or NGS due to the presence of competing wild type  
65 sequences and the need for calibration. Using dPCR, eighteen laboratories were able to  
66 quantify the G12D marker within 12% of each other in all samples. Three laboratories  
67 appeared to measure consistently outlying results; however, proper application of a follow-  
68 up analysis recommendation rectified their data. Our findings show that dPCR has  
69 demonstrable reproducibility across a large number of laboratories without calibration  
70 and could enable the reproducible application of molecular stratification to guide therapy,  
71 and potentially for molecular diagnostics.

72 **KEYWORDS**

73 digital PCR, ddPCR, reproducibility, *KRAS*, single nucleotide variant, rare sequence variant

74 **SIGNIFICANCE STATEMENT**

75 The poor reproducibility of molecular diagnostic methods limits their application in part  
76 due to the challenges associated with calibration of what are relative measurement  
77 approaches. In this study we investigate the performance of one of the only absolute  
78 measurement methods available today, digital PCR (dPCR), and demonstrated that when  
79 compared across twenty-one laboratories, dPCR has unprecedented reproducibility. These

80 results were achieved when measuring a challenging single nucleotide variant and without  
81 calibration to any reference samples. This opens the possibility for dPCR to offer a method  
82 to transform reproducibility in the molecular diagnostic field, both by direct use as well as  
83 in support of other currently used clinical methods.

## 84 INTRODUCTION

85 Quantification using real-time quantitative PCR (qPCR) was first described over two  
86 decades ago (1, 2). Since then, despite its application to a wide range of preclinical research  
87 areas and its capacity for performing precise nucleic acid quantification, there are only a  
88 small number of examples where it has been successfully translated into the clinic for  
89 quantification, primarily in the fields of clinical virology (3) and management of patients  
90 with CML (4). Obstacles to its widespread clinical adoption have been the challenges of  
91 standardisation and defining the technical reproducibility of the method (5, 6). In qPCR,  
92 reproducibility is often poor due to the fact that while it can be very precise, it can be  
93 biased (6); it is not unusual for viral titres to vary by several orders of magnitude between  
94 different laboratories in the absence of a calibrator material (7).

95 Digital PCR (dPCR), where the presence or absence of a target molecule is detected in a  
96 binary and absolute fashion, is an alternative method that has the potential to be  
97 considerably more reproducible than qPCR. It also offers a number of advantages that  
98 include high precision (8-13) and improved sensitivity and specificity (14-18), all without  
99 reliance on a calibration curve (19, 20). This high precision has been employed to value-  
100 assign certified reference materials that include a plasmid for *BCR-ABL1* monitoring in  
101 chronic myeloid leukaemia (21) and genomic DNA for *HER2* amplification detection in

102 breast cancer (22). Prototype reference materials of plasmid, genomic DNA and whole  
103 bacteria in synthetic sputum for Tuberculosis have also been evaluated using dPCR (12,  
104 23). However, the method has not yet been demonstrated to surmount the challenges of  
105 end-user inter-laboratory reproducibility that will be necessary if it is to be used for  
106 routine clinical use.

107 The central aim of this study was to evaluate the reproducibility of droplet-based dPCR  
108 using an international end-user inter-laboratory comparison. The chosen target was a  
109 *KRAS* single nucleotide variant (SNV), one of the most challenging types of cancer  
110 biomarkers, which is being pursued vigorously in liquid biopsy translational studies that  
111 predict non-response to specific therapies in colorectal carcinomas (24, 25) and non-small  
112 cell lung cancers (26).

## 113 **RESULTS**

114 **Design of the study.** Twenty-one participant laboratories were enrolled in the study to  
115 measure blinded samples that contained varying fractional abundances of a 186 bp plasmid  
116 fragment containing the *KRAS* G12D variant and/or the wild-type (*wt*) sequence  
117 (**Supplementary Document 1** and **Fig. S1**). Each participant laboratory was provided with  
118 three units of each of the four blinded test samples. These test samples were at different  
119 nominal G12D fractional abundances: 12%, 0.9%, 0.17% and 0% and randomly assigned a  
120 sample letter (A-D) (**Table 1**). Additionally two control samples were provided as three  
121 units of the negative control (0% G12D; which was the same as sample B and denoted NEG)  
122 and a single unit of the positive control (12% G12D; which was the same as sample D and  
123 denoted POS). The %G12D of the POS control was not revealed to the participants and so

124 could not be used as a calibrator for the blinded samples. Reagents and QX100/200™  
125 consumables from common manufacturing lots (**Supplementary Document 2**) were  
126 provided to the participants along with a full protocol (**Supplementary Document 3**), that  
127 included the reaction preparation procedure and the plate layout, to minimise these as  
128 possible sources of variation. All packages were distributed by LGC who coordinated the  
129 study.

130 Participants used their own QX100/200™ Droplet Digital PCR System (Bio-Rad) with  
131 manual droplet generation and were requested to analyse their data using their routine  
132 procedure. Each laboratory submitted their mean value for the *KRAS* G12D and *wt* copy  
133 number concentrations and %G12D with the associated 95% confidence intervals for each  
134 sample, control and no template controls (NTCs) in a pre-designed spreadsheet format  
135 (summarised in **Table S1**). Details of their analysis method (**Table S2**) and screen shots of  
136 the analysis (not shown) were also requested.

137 **Inter-laboratory comparison.** For the quantification of the *KRAS* G12D and *wt* copy  
138 number concentrations and %G12D, dPCR measurements from the twenty-one  
139 laboratories were highly accurate over the three orders of magnitude (~0.42 to ~2200  
140 copies/μL) reflected in the blinded test samples (**Fig. 1**) and two control samples (**Fig. S2**).  
141 There were two groups of results. The majority of the laboratories (18/21) measured both  
142 the copy number concentrations and fractional abundance of all samples within 20% of  
143 each other. The remaining three laboratories consistently under-quantified the G12D copy  
144 number concentration and associated fractional abundance in all samples, though they did  
145 report consensus values for the *wt* target concentration. There was no significant

146 difference in the copy number concentrations or fractional abundance of sample B and NEG  
147 ( $p > 0.12$ ) or sample D and POS ( $p > 0.82$ ). The median participant values for all six samples  
148 were within 6% of the mean values obtained in the homogeneity study performed by the  
149 co-ordinating laboratory (LGC) that manufactured and characterised the samples (**Table**  
150 **1**). The exception was for the G12D copy number concentration and fractional abundance  
151 of sample B and NEG, that contained no *KRAS* G12D target, that varied by 16-28%.

152 Of the first group of results, fourteen laboratories had no outlier values in any of the test or  
153 control samples (**Fig. 1** and **S2**). The remaining four laboratories (3, 7, 10 and 16) had  
154 outlier values in one or more of the measurements for one or more samples which were  
155 associated with moderately higher or lower *wt* or G12D copy number concentration or  
156 fractional abundance (>1.5-fold different from the median value). The group that  
157 consistently under-quantified the G12D molecules (2, 17 and 21) were all identified as  
158 outliers and submitted values that were between 2- and 9-fold lower than the median for  
159 the G12D (but not *wt*) copy number concentration and fractional abundance.

160 **Factors affecting reproducibility.** Following visual inspection of the two-dimensional  
161 (2D) scatter plots produced by the QuantaSoft ddPCR analysis software, it was  
162 hypothesised that the cause of the G12D under-quantification in laboratories 2, 17 and 21  
163 was misclassification of the droplets (**Fig. S3**). This hypothesis was tested by preparation of  
164 guidelines for droplet classification that were circulated to all participants  
165 (**Supplementary Document 4**). At this stage all participants remained blind to the copy  
166 number concentrations. The seven laboratories with one or more outlier were invited



167 optionally to reanalyse their original data following the guidelines. In parallel, the  
168 coordinating laboratory reanalysed the seven laboratory data sets following the guidelines.

169 Four laboratories resubmitted their values (2, 10, 17 and 21) (**Table S3**). In contrast to  
170 their originally submitted values, for two of the laboratories (2 and 21), no significant  
171 difference was observed between their resubmitted values and the median values from the  
172 original inter-laboratory comparison ( $p > 0.35$ ) suggesting that the guidelines rectified the  
173 droplet misclassification (**Fig. 2** and **S4**). However, laboratory 17 resubmitted values that  
174 were ~1.2-fold higher than their original submission, but still significantly lower (>2-fold)  
175 than the median values from the original inter-laboratory analysis ( $p \leq 0.012$ ) (**Fig. 2** and  
176 **S4**). Reanalysis of this data set by the coordinating laboratory identified no significant  
177 difference between their values and the median values from the original inter-laboratory  
178 analysis ( $p > 0.14$ ) (**Fig. 2** and **S4**) suggesting that droplet misclassification, and not the  
179 actual data generated, was still responsible for the under-quantification of this laboratory.

180 Laboratory 10, which was an outlier in only one value in one test sample (the G12D  
181 fractional abundance in sample D), resubmitted values that were not significantly different  
182 from those obtained by the coordinating laboratory (**Fig. 2** and **S4**) indicating that droplet  
183 misclassification was not responsible for this single outlier result. The other three  
184 laboratories (3, 7 and 16) communicated that they were satisfied that their original  
185 analysis aligned with the guidelines; there was no significant difference between their  
186 original values and those obtained by the coordinating laboratory ( $p > 0.34$ ).

187 Between-laboratory precision was calculated for all samples and controls using the four  
188 resubmitted laboratory values along with the original values from the other seventeen

189 laboratories. For nominal copy number concentrations  $>0.1$  copies/ $\mu\text{L}$ , the precision was  
190 high across all the samples and targets; CVs were between 7.39% and 11.39% (**Table 2**).  
191 Calculation of the theoretical CV (tCV) for each value for each sample showed that the  
192 precision based on Poisson alone was generally only slightly smaller than the between-  
193 laboratory precision for the G12D and *wt* copy number concentrations in the samples that  
194 contained G12D molecules (**Table 2**) indicating a minimum of experimental error. For the  
195 corresponding G12D fractional abundances, the precision was high for all samples that  
196 contained G12D fragments (CV  $<4.8\%$ ).

197 For the *wt* only samples, that contained  $\sim 40,000$  *wt* copies/reaction and no G12D  
198 fragments (Samples B and NEG), the identification of positive partitions for the G12D assay  
199 represented the false positive rate (FPR) of the assay. A median FPR of 0.02% G12D was  
200 observed in these samples that corresponded to a median of  $\sim 6$  G12D-positive  
201 partitions/reaction (minimum of 0 and maximum of 14 across all 21 participants NEG  
202 reactions;  $n=198$ ) (**Table S4**). Measurements of the *KRAS* G12D molecule in these samples  
203 had reduced precision (CV  $>24\%$ ) as would be expected for such low measured values. For  
204 the no template controls (NTCs), a median and mode of 0 G12D-positive  
205 partitions/reaction was observed (maximum of 3 across all 21 participants,  $n=186$ ) (**Table**  
206 **S5**) indicating low, if any, contamination in the dPCR reactions.

207 The *KRAS wt* copy number concentrations were approximately equal for samples A, B and C  
208 (**Table 1**). To generate a metric to measure the impact of various deviations from the study  
209 protocol, the ratio of the *KRAS wt* copy number concentration of samples C and A was used.  
210 From the results of the questionnaire relating to the study protocol (**Table S2**) no

211 significant difference ( $p > 0.14$ ) was observed related to the QX system or version of the  
212 QuantaSoft analysis software used, number of times the samples were thawed prior to  
213 analysis or any other deviations from the protocol such as the supplier of pipettes, plate  
214 sealer or PCR cycler (**Fig. S5**).

215 Characterisation of each study material established that the between-unit variation did not  
216 exceed the within-unit variation ( $p > 0.24$  for all study materials) (**Fig. S6**) and so estimated  
217 standard uncertainties due to possible inhomogeneity were calculated using the between-  
218 unit variation. The relative standard uncertainties were  $< 6\%$  for samples containing G12D  
219 molecules (**Table 1**) and so it was concluded that the unit homogeneity of all the study  
220 materials was acceptable.

221 Stability studies identified no significant time or temperature effect over the short term for  
222 the G12D and *wt* copy number concentrations with the exception of sample D/POS that had  
223 a 1.1-fold decrease in both G12D and *wt* copy number concentrations (but no effect on the  
224 fractional abundance, data not shown) when stored on dry ice for 7 days (**Fig. S7**). For the  
225 long term stability study, small differences in the G12D and *wt* copy number concentrations  
226 were observed over the six month duration of the stability study (**Fig. S8**). For both  
227 stability studies the differences were minor ( $< 12\%$ ), non-directional (with the exception of  
228 sample D/POS), and all participants performed their experiments within one month of  
229 receiving the samples, it was concluded that the stability of the materials was satisfactory.

## 230 **DISCUSSION**

231 The aim of this study was to investigate whether dPCR could offer reproducible  
232 quantification between laboratories in the absence of calibration using a droplet-based  
233 technology. We used an international inter-laboratory study focusing on the quantification  
234 of a range of SNV concentrations, of varying fractional abundances, using droplet dPCR.  
235 Participant laboratories were recruited from a range of institutes including hospitals,  
236 universities and research industries. To our knowledge, this is the first study of its kind and  
237 could form the basis of a framework for other studies investigating the reproducibility and  
238 robustness of a given dPCR method. For this purpose, we used a clinically relevant  
239 prognostic model of a *KRAS* point mutation that needs to be determined prior to selection  
240 of treatment of specific cancers (27, 28).

241 We chose a range of G12D to *wt* fractional abundances, several of which are challenging to  
242 quantify with currently used analytical methods (29, 30). Furthermore, as the interest in  
243 liquid biopsies continues to rise, we directed the selection of the concentration and size of  
244 the molecules quantified in this study to match this template type (31, 32). Comparison of  
245 the independent measurements from twenty-one laboratories demonstrated the high level  
246 of reproducibility of dPCR, defined as a CV of <12%. Further investigation identified that  
247 most of this variation could be attributed to deviations in tube-to-tube unit homogeneity  
248 and stability of the test materials as well as the Poisson error, thereby rendering this  
249 reproducibility all the more impressive.

250 This study clearly demonstrated that fractional abundances down to ~0.2% can be  
251 reproducibly quantified using dPCR. As the observed FPR was ~0.02%, it suggests that a  
252 lower limit of detection of the G12D molecule, such as 0.1%, may be achievable with dPCR.

253 However, the observed ~0.2% fractional abundance was enabled, in part, by the addition of  
254 ~40,000 *KRAS* copies per reaction; this level of sensitivity may not always be achievable  
255 using *in vivo* extracts such as cfDNA from plasma, that typically yields ~500 copies/mL  
256 plasma (33). In addition to cancer models, other rare SNV models would also be applicable  
257 to this framework (14, 15) as well as simpler targets that do not require specific  
258 measurement of a given variant in the presence of the *wt* allele, such as quantification of  
259 specific pathogens or gene fusions (34, 35).

260 Two distinct aspects of this technique demonstrate that dPCR is reproducible for absolute  
261 quantification measurements. Firstly, all participant laboratories were blind to the target  
262 quantities of each test sample, yet twenty laboratories were able to correctly quantify all  
263 four test samples. Secondly, all the measurements were performed without any form of  
264 calibration to a material of known quantity; the materials were simply quantified and  
265 results reported directly.

266 In order to determine sources of discrepancy where they arose, we investigated a number  
267 of parameters that could influence reproducibility and robustness. Deviations from the  
268 study protocol, such as droplet handling using different pipettes and tips to those  
269 recommended did not have significant effects on the quantification. Furthermore,  
270 participants used different software versions to collect their data. Versions 1.3 and below  
271 use a 0.91 nL droplet volume that has been identified as a source of bias in other studies  
272 (36), whilst the smaller volume of 0.85 nL is used in versions 1.6 and above. While the use  
273 of different partition volumes can impact on accuracy, in this study, the two partition

274 volumes used did not appear to impact on the between-laboratory reproducibility (**Fig.**  
275 **S5**), suggesting that technical error masked this potential source of bias.

276 All participants used the same assays, reagents and consumables in this study; another  
277 study where these were varied demonstrated good reproducibility (12). Additionally, this  
278 study did not evaluate pre-analytical steps such as the extraction, however, with careful  
279 optimisation, quantification can be reproducible even when the extraction step is  
280 incorporated (23).

281 Incorrect classification of the positive and negative droplets was a main cause of under-  
282 quantification by some laboratories. Partition misclassification has been highlighted as a  
283 source of bias in dPCR quantification (37) and can be complicated by a number of factors  
284 that include template type, source and matrix in addition to assay and reagent choice and  
285 thermocycling conditions (12). When measuring SNV quantities further factors that can  
286 impact on correct partition classification include assay specificity, partition specific  
287 competition (PSC) and assay FPR. Assay specificity and PSC can make it more difficult to  
288 classify the four cluster types (38) while the FPR, if not determined correctly can impact on  
289 the sensitivity of the assay and lead to an underestimation.

290 The presence of G12D false-positive droplets in the *wt*-only (NEG) control in two of the  
291 participant laboratories directed the analysts to be stringent with their droplet  
292 classification and opt for increased specificity over sensitivity; such a method has been  
293 adopted in another study (39). While this reduced the FPR (increasing specificity), it was at  
294 the expense of sensitivity and resulted in a 2 to 3-fold negative bias due to the high total  
295 DNA input per reaction. Therefore, for the most sensitive measurements, characterisation

296 of the FPR is needed. However, in order for the clinical utility of this method to be realised,  
297 rigorous criteria for calling positive results, along with detailed investigation of the limits  
298 of detection and quantification need to be developed and evaluated as illustrated with  
299 *EGFR* mutations in lung cancer (40, 41).

## 300 **CONCLUSIONS**

301 This study has confirmed that dPCR can perform highly reproducible absolute  
302 quantification of an SNV between laboratories differing in their reported value by <12%.  
303 This was achieved without calibration, which is not possible using conventional qPCR when  
304 measuring samples that contain challenging fractional abundances of <1%. Clinical  
305 quantification of SNVs has been proposed for a range of applications such as monitoring  
306 donor organ rejection (17) or in the treatment of cancer patients (16) and will likely be  
307 needed for the development of precision/stratified medicine to be fully realised. These  
308 findings suggest dPCR will have an important role in enabling such measurements. In the  
309 short term, this study will contribute to a growing body of evidence that demonstrate that  
310 dPCR can offer a valuable method to ensure reproducible quantification of nucleic acids.

## 311 **MATERIALS AND METHODS**

312 The coordinating laboratory for this study was LGC (UK). All experiments pertaining to the  
313 production and characterisation of the study materials were performed at LGC. All kits and  
314 instruments were used following the manufacturer's instructions.

315 **Production of the study materials.** A portion of the human *KRAS* gene encoding exon 2  
316 and its flanking introns was downloaded from the NCBI database (NCBI accession:

317 NG\_007524.1, bases 9788 to 11411). The location of the drug resistant mutation (c. 35G>A)  
318 that encodes the amino acid substitution G12D was identified. The inserts were  
319 synthesised using overlapping synthetic oligonucleotides and then blunt-end cloned into  
320 the *EcoRV* restriction site of the pUC57 plasmid (Eurofins) to generate two constructs: one  
321 containing the wild type (*wt*) sequence and one containing the G12D mutation. Sequence  
322 validation was performed by Sanger sequencing on both strands (Eurofins) (**Fig. S9A** and  
323 **S9B**).

324 Ten double restriction digest reactions were set up for each *KRAS* construct each  
325 containing approximately 10 µg of DNA with 25 units each of *AflIII* and *NsiI* (New England  
326 Biolabs) in a 50 µL reaction volume. The reactions were incubated at 37 °C for three hours  
327 and subjected to electrophoresis through a 3% agarose gel. Each 186 bp fragment was  
328 identified using the 1kb+ DNA ladder (Invitrogen), gel purified using the Gel Extraction kit  
329 (Qiagen) and eluted in 30 µL of EB buffer; the 10 replicate reactions were pooled to give a  
330 total eluent volume of 300 µL. The two 186 bp fragments (*KRAS wt* and G12D) were  
331 assessed for size and purity using the 2100 Bioanalyzer with the DNA 7500 series II assay  
332 (Agilent) (**Fig. S9C** and **S9D**) and the concentration was estimated using the Qubit® 2.0  
333 fluorometer with the dsDNA HS Assay Kit (Invitrogen) to give the 'nominal' stated values  
334 for each test sample and control. The copy number concentration was estimated based on  
335 the molecular weight of the 186 bp fragment (approximately 116 kDa) and the Avogadro  
336 constant using a standard method (42); 1 ng corresponds to approximately  $2.01 \times 10^8$   
337 copies.



338 The four study materials were manufactured in 50 mL tubes by gravimetrically diluting the  
339 *KRAS wt* and G12D purified 186 bp fragments in non-human carrier to their nominal  
340 concentrations (**Table 1**). Carrier was commercially available sonicated salmon sperm  
341 genomic DNA (Ambion) at a final concentration of 25 ng/ $\mu$ L in the study materials. The  
342 study materials were mixed by rotation at 50 rpm at 4 °C for 30 minutes. One test material  
343 was prepared from each study material; these were randomly labelled as samples A, B, C or  
344 D to reduce analyst bias. In addition, two control materials were prepared from two of the  
345 study materials; the negative control (NEG) was the same as Sample B and the positive  
346 control (POS) was the same as Sample D. Following mixing, the four test and two control  
347 samples were aliquoted (>100  $\mu$ L) in pre-labelled 0.5 mL tubes (P/N E1405-2120;  
348 StarLabs) to generate between 75 and 300 units and stored at -20 °C. To reduce  
349 contamination risks, the test materials were manufactured in order of increasing G12D  
350 concentration.

351 **Characterisation of study materials.** Unit homogeneity was evaluated across twelve  
352 randomly selected units for each study material that were maintained at -20 °C. The short  
353 term stability (STS) study was set up isochronously at a range of temperatures to monitor  
354 the stability of the study materials during shipment to the participants and the accelerated  
355 stability at high temperature. Three units of each of the four study materials were  
356 incubated on dry ice (shipment temperature), at 4 °C and 28 °C (accelerated stability  
357 temperature) for 2 and 7 days and compared to the baseline temperature (three units  
358 maintained at -20 °C). Following all temperature and time point conditions, the study  
359 materials were incubated at -20 °C overnight before dPCR analysis. The long term stability  
360 (LTS) study was performed to establish the stability of the study materials over the full

361 course of the study. Three units of each of the four study materials were maintained on dry  
362 ice for 5 days to mimic shipping conditions, before being transferred to -20 °C before  
363 storage for 1 or 7 months prior to dPCR analysis; parallel experiments were compared with  
364 samples maintained at -20 °C for the duration of the LTS. Details of the dPCR analysis  
365 performed are in the relevant section below.

366 **Droplet Digital PCR.** All dPCR experiments were implemented in accordance with the  
367 dMIQE guidelines (**Table S6**) (20) using the QX100™ or QX200™ Droplet Digital PCR  
368 System (Bio-Rad). Briefly, 22 µL reactions were established containing ddPCR Supermix for  
369 Probes with no dUTP, PrimePCR™ ddPCR™ Mutation Assays for KRAS p.G12D and KRAS  
370 WT (assay details in the relevant section below), 8.8 µL of study material and made up to  
371 volume with nuclease-free water. No template controls (NTCs) were performed using  
372 nuclease-free water in place of template in every experiment. Droplets generation was  
373 performed manually (*not* with the AutoDG™ system) from 20 µL of the reaction following  
374 manufactures guidelines. Thermocycling conditions were 95 °C for 10 minutes, 40 cycles of  
375 94 °C for 30 seconds and 55 °C for 1 minute, followed by 98 °C for 10 minutes and a 4 °C  
376 hold. The ramp rate for each step was set to 2 °C/second. Droplet reading was performed  
377 following manufactures guidelines. Details of the protocol are given in **Supplementary**  
378 **Document 3.**

379 For the study material characterisation, experiments were performed using the QX200™  
380 droplet digital PCR system with a randomised plate layout. Every study unit was analysed  
381 with triplicate wells. Aliquots of the carrier the study materials were made up with were  
382 also evaluated for the presence of *KRAS* sequences (carrier only controls); no positive

383 droplets for the *KRAS* G12D were observed. If multiple 96-well plates were necessary,  
384 replicate units were distributed between the different plates with the triplicate dPCR wells  
385 for each unit located on the same plate. The commercially available PrimePCR™ ddPCR™  
386 Mutation Assays used were *KRAS* p.G12D, Human (P/N 10031246, Assay ID  
387 dHsaCP2000001) and *KRAS* WT for p.G12D, Human (P/N 10031249, Assay ID  
388 dHsaCP2000002) that generate a 90 nt amplicon. All PrimePCR assays are designed and  
389 validated by the manufacturer on the QX100/200 droplet digital PCR system. The  
390 QuantaSoft software version 1.7.4.0917 was used to collect the data in the ‘ABS’ mode. The  
391 status of each well was checked and wells containing <10,000 droplets or a baseline drop  
392 in the double-negative droplets compared with the NTC wells were omitted from the data  
393 set. Thresholds were set using the ‘auto analyze’ and ‘combined wells’ setting in the 2D  
394 amplitude mode to define the positive and negative droplets. The data was exported as a  
395 .csv file for further analysis.

396 Prior to the inter-laboratory comparison, a pilot study was performed to test the  
397 international shipment method of the study materials, reagents and consumables, and the  
398 clarity of the protocol. Three Bio-Rad laboratories (USA, France and Germany) participated  
399 in the pilot study to confirm that the shipment conditions were acceptable. Following the  
400 data analysis, the preparation protocol for the reagents and the dPCR protocol were  
401 amended. The final documents and details are included in the supplementary information  
402 as cited below.

403 Participant laboratories were provided with the protocol by the coordinating laboratory  
404 (**Supplementary Document 3**). The commercially available PrimePCR™ ddPCR™ Mutation

405 Assays used were KRAS p.G12D, Human (P/N 10031246, Assay ID **dHsaCP2500596**)  
406 and KRAS WT for p.G12D, Human (P/N 10031249, Assay ID dHsaCP2500597) that  
407 generates a smaller amplicon of 57 nt for each assay compared with the assay used for  
408 material characterisation. Each unit was analysed in triplicate wells alongside eight no  
409 template controls (NTCs) to give a total of 56 reaction wells in a single experiment; a plate  
410 layout was provided in the protocol. The droplets were read in the 'ABS' mode using a  
411 QuantaSoft template file provided by the coordinating laboratory. Participants could use  
412 either the QX100™ or QX200™ Droplet Digital™ system. Each laboratory was asked to  
413 complete a questionnaire with details of their ddPCR instrumentation, software version  
414 and data analysis methods (**Supplementary Document 3**). They were requested to report  
415 the concentration (copies/ $\mu$ L in the reaction) and percentage allelic frequency of the *KRAS*  
416 G12D in each of the four test samples and two controls with the associated 95% confidence  
417 intervals as well as the result of their NTCs. In addition to the questionnaire, laboratories  
418 were asked to submit their raw data (QuantaSoft .csv and .q1p files) and screen shots of the  
419 2D scatter plots of the control samples (NEG, POS and NTC).

420 **Data analysis.** For the characterisation of the test materials, exported .csv files were  
421 imported into MS Excel 2010 in the first instance with further analysis performed in the R  
422 statistical programming environment version 3.1.1 (<http://www.r-project.org/>) and Prism  
423 6 (GraphPad). A tab delimited file was generated in MS Excel 2010 containing the well  
424 number, sample name, unit number, replicate well number, software generated copies/ $\mu$ L  
425 in the reaction for the *KRAS* G12D and *wt* molecule.

426 For assessment of unit homogeneity, ANOVA and mixed effects models with maximum  
427 likelihood estimation described previously (43) were used to assess plate and unit  
428 variation, and to estimate the between-unit standard deviation. Analysis of STS and LTS  
429 study was performed by fitting a linear model to each test material with time and  
430 temperature as the covariates to determine if the copy number concentration varied with  
431 storage time; the time variate was treated as a continuous variable. Statistical significance  
432 was identified using the Bonfernoni correction for false discovery rate (44) so that  
433 significance was identified when  $p < 0.004$  for the STS and  $p < 0.01$  for the LTS.

434 The reported values and confidence intervals from each end-user laboratory were  
435 transcribed into Prism 6 for analysis and generation of graphs. The data was tested for  
436 normality using the Shapiro-Wilk test with non-normality assigned to data when  $p < 0.05$ .  
437 Robust statistics were used for the non-normally distributed data to estimate the  
438 consensus values and the between lab dispersion using the median and median absolute  
439 deviation (MAD), respectively. The MAD was calculated as follows using equation [1]:

$$440 \quad MAD = median_i (|X_i - median_j(X_j)|) \quad [1]$$

441 Where  $median_i$  is the median of the reported values from the laboratories, and  $median_j$  is  
442 the median of the absolute difference between the reported values and median. The MAD  
443 was then used to estimate the  $MAD_E$  using equation [2]:

$$444 \quad MAD_E = MAD \times 1.4826 \quad [2]$$

445 Where the 1.4826 was selected as the consistency constant; for details on the calculation of  
446 this value see Staudt *et al.*, 1990 (45). Submitted values outside the upper and lower 99%

447 confidence intervals (calculated using 2.58  $MAD_E$  distributions away from the median)  
448 were identified as outliers; this level of confidence was chosen as there were more than 20  
449 laboratories enrolled in the study. A robust estimate of reproducibility that down weights  
450 the influence of outliers was calculated using equation [3]:

$$451 \quad \%CV = \frac{MAD_E}{median} \quad [3]$$

452 Paired t-tests were used to compare two groups of data; for example, to test for differences  
453 between sample B and the negative control, or between the participant resubmitted data  
454 and the coordinating laboratory analysis.

## 455 **ACKNOWLEDGEMENTS**

456 The work described in this paper was funded by the UK government Department for  
457 Business, Energy & Industrial Strategy (BEIS) and the European Metrology Research  
458 Programme (EMRP) joint research project (SIB54) Bio-SITrace  
459 (<http://biositrace.lgcgroup.com>) which is jointly funded by the EMRP participating  
460 countries within EURAMET and the European Union. The authors would like to thank  
461 David Littlemore (LGC) for his central support in the distribution of the materials needed  
462 for this study and Pia Scheu (Bio-Rad, Munich, Germany) and Ronald Lebofsky (Bio-Rad,  
463 Marnes, France) for their assistance in running pilot experiments to test shipping of  
464 samples and kits, and the clarity of the protocol prior to the end-user inter-laboratory  
465 study. The authors would also like to thank Cloud Paweletz (Dana Farber Cancer Institute)  
466 for critical review of the manuscript prior to submission.

467 The following authors provided technical and analytical support to the participant  
468 laboratories: Isabelle Iacono and Stéphanie Brejon (Centre Léon Berard), Ekkehard Schuetz  
469 (Chronix Biomedical), Ana Patiño-Garcia (Clínica Universidad de Navarra), Antoine Carlouz  
470 (Assistance Publique Hôpitaux de Marseille), Reinhold Pollner (Genoptix), Virginie Poulot  
471 (Tenon Hospital), Anne Casanova and Gilles Favre (Institut Claudius Regaud), Charles  
472 Decraene (Institut Curie), Ben Ho Park (Johns Hopkins), Anthony M. George (Lund  
473 University), Peter Kaltoft Böhm Nielsen (Sjællands Universitetshospital), Vito Lampasona  
474 (Division of Genetics and Cell Biology, and Division of Genetics and Cell Biology & Diabetes  
475 Research Institute, San Raffaele Scientific Institute), Julian Downward (Institute of Cancer  
476 Research), Daniel Schwerdel (Ulm University), Alice Gutteridge (University College  
477 London), Curtis B. Hughesman (University of British Columbia), Daniel Fernandez Garcia  
478 and Jacqueline A. Shaw (University of Leicester) and Helen Huang (MD Anderson Cancer  
479 Center). The Dana Farber Cancer Institute would also like to acknowledge the Expect  
480 Miracles Foundation.

#### 481 **AUTHOR CONTRIBUTIONS**

482 A.S.W., A.S.D., G.K-N., J.R., S.C., S.T and J.F.H. designed the study, and analysed and  
483 interpreted the data. A.S.W., A.F-G., G.M.J. and N.R. produced and characterised the material.  
484 L.J. prepared and performed the quality control on the reagents and assays. G.K-N, J.F.H.  
485 and S.T. conceived the study. C.A.F., H.P. and J.F.H. obtained funding for the study. J.B.,  
486 A.W.B., V.C., N.D.K., L.D., F.F., T.F., R.F.A., S.G., A.G.H., C.A.H., F.J., R.L., J.L., V.M., A.P., A.P., C.P.,  
487 L.S., E.S. and B.U performed the experiments for the inter-lab study. The manuscript was

488 written by A.S.W., G.K.N., and J.F.H. All authors reviewed and provided editorial comments  
489 on the manuscript.

#### 490 **DISCLOSURES & CONFLICT OF INTERESTS**

491 G.K.N., J.R., L.J. and S.T. are employees of Bio-Rad Laboratories who make and supply  
492 droplet digital PCR instruments and reagents. dPCR reagents, assays and consumables for  
493 the inter-laboratory study were supplied by Bio-Rad Laboratories to the twenty-one end-  
494 user laboratories. The production and characterisation of the study materials was  
495 performed at LGC using separately purchased reagents, assays and consumables. B.U. is an  
496 employee of The Dana Farber Cancer Institute that has a pending patent related to non-  
497 invasively monitoring of genomic alterations in cancer for the reproducible measurement  
498 of rare variants using droplet digital PCR.

#### 499 **REFERENCES**

- 500 1. Higuchi R, Fockler C, Dollinger G, & Watson R (1993) Kinetic PCR analysis: real-time  
501 monitoring of DNA amplification reactions. *Bio/technology (Nature Publishing*  
502 *Company)* 11(9):1026-1030.
- 503 2. Wittwer CT, Herrmann MG, Moss AA, & Rasmussen RP (1997) Continuous  
504 fluorescence monitoring of rapid cycle DNA amplification. *BioTechniques* 22(1):130-  
505 131, 134-138.
- 506 3. Madej RM, *et al.* (2010) International Standards and Reference Materials for  
507 Quantitative Molecular Infectious Disease Testing. *J Mol Diagn* 12(2):133-143.



- 508 4. Hughes T, *et al.* (2006) Monitoring CML patients responding to treatment with  
509 tyrosine kinase inhibitors: review and recommendations for harmonizing current  
510 methodology for detecting BCR-ABL transcripts and kinase domain mutations and for  
511 expressing results. *Blood* 108(1):28-37.
- 512 5. JCGM (2008) Evaluation of measurement data – Guide to the expression of  
513 uncertainty in measurement (ISO/IEC Guide 98-3).  
514 [http://www.bipm.org/utis/common/documents/jcgm/JCGM\\_100\\_2008\\_E.pdf](http://www.bipm.org/utis/common/documents/jcgm/JCGM_100_2008_E.pdf).
- 515 6. Bustin SA, *et al.* (2009) The MIQE guidelines: minimum information for publication of  
516 quantitative real-time PCR experiments. *Clin Chem* 55(4):611-622.
- 517 7. Fryer JF, *et al.* (2008) Development of working reference materials for clinical  
518 virology. *J Clin Virol* 43(4):367-371.
- 519 8. White RA, 3rd, Quake SR, & Curr K (2012) Digital PCR provides absolute quantitation  
520 of viral load for an occult RNA virus. *J Virol Methods* 179(1):45-50.
- 521 9. Whale AS, *et al.* (2012) Comparison of microfluidic digital PCR and conventional  
522 quantitative PCR for measuring copy number variation. *Nucleic Acids Res.* 40(11):e82.
- 523 10. Hayden RT, *et al.* (2013) Comparison of droplet digital PCR to real-time PCR for  
524 quantitative detection of cytomegalovirus. *J Clin Microbiol* 51(2):540-546.
- 525 11. Pinheiro LB, *et al.* (2012) Evaluation of a droplet digital polymerase chain reaction  
526 format for DNA copy number quantification. *Anal Chem* 84(2):1003-1011.
- 527 12. Devonshire AS, *et al.* (2015) Highly reproducible absolute quantification of  
528 *Mycobacterium tuberculosis* complex by digital PCR. *Analytical chemistry* 87(7):3706-  
529 3713.

- 530 13. Hindson CM, *et al.* (2013) Absolute quantification by droplet digital PCR versus analog  
531 real-time PCR. *Nature methods* 10(10):1003-1005.
- 532 14. Kelley K, Cosman A, Belgrader P, Chapman B, & Sullivan DC (2013) Detection of  
533 methicillin-resistant *Staphylococcus aureus* by a duplex droplet digital PCR assay. *J*  
534 *Clin Microbiol* 51(7):2033-2039.
- 535 15. Lench N, *et al.* (2013) The clinical implementation of non-invasive prenatal diagnosis  
536 for single-gene disorders: challenges and progress made. *Prenatal diagnosis*  
537 33(6):555-562.
- 538 16. Taly V, *et al.* (2013) Multiplex Picodroplet Digital PCR to Detect KRAS Mutations in  
539 Circulating DNA from the Plasma of Colorectal Cancer Patients. *Clin Chem*  
540 59(12):1722-1731.
- 541 17. Beck J, *et al.* (2013) Digital Droplet PCR for Rapid Quantification of Donor DNA in the  
542 Circulation of Transplant Recipients as a Potential Universal Biomarker of Graft  
543 Injury. *Clin Chem* 59(12):1732-1741.
- 544 18. Hindson BJ, *et al.* (2011) High-throughput droplet digital PCR system for absolute  
545 quantitation of DNA copy number. *Anal Chem* 83(22):8604-8610.
- 546 19. White RA, 3rd, Blainey PC, Fan HC, & Quake SR (2009) Digital PCR provides sensitive  
547 and absolute calibration for high throughput sequencing. *BMC genomics* 10:116.
- 548 20. Huggett JF, *et al.* (2013) The Digital MIQE Guidelines: Minimum Information for  
549 Publication of Quantitative Digital PCR Experiments. *Clin Chem* 59(6):892-902.
- 550 21. White H, *et al.* (2015) A certified plasmid reference material for the standardisation of  
551 BCR-ABL1 mRNA quantification by real-time quantitative PCR. *Leukemia* 29(2):369-  
552 376.

- 553 22. Lih CJ, *et al.* (2016) Certified DNA Reference Materials to Compare HER2 Gene  
554 Amplification Measurements Using Next-Generation Sequencing Methods. *J Mol Diagn*  
555 online advanced publication.
- 556 23. Devonshire AS, *et al.* (2016) The use of digital PCR to improve the application of  
557 quantitative molecular diagnostic methods for tuberculosis. *BMC Infectious Diseases*  
558 16:366.
- 559 24. Lievre A, *et al.* (2008) KRAS mutations as an independent prognostic factor in patients  
560 with advanced colorectal cancer treated with cetuximab. *Journal of clinical oncology :*  
561 *official journal of the American Society of Clinical Oncology* 26(3):374-379.
- 562 25. Lievre A, *et al.* (2006) KRAS mutation status is predictive of response to cetuximab  
563 therapy in colorectal cancer. *Cancer research* 66(8):3992-3995.
- 564 26. Jackman DM, *et al.* (2009) Impact of epidermal growth factor receptor and KRAS  
565 mutations on clinical outcomes in previously untreated non-small cell lung cancer  
566 patients: results of an online tumor registry of clinical trials. *Clinical cancer research :*  
567 *an official journal of the American Association for Cancer Research* 15(16):5267-5273.
- 568 27. van Krieken JH, *et al.* (2008) KRAS mutation testing for predicting response to anti-  
569 EGFR therapy for colorectal carcinoma: proposal for an European quality assurance  
570 program. *Virchows Archiv : an international journal of pathology* 453(5):417-431.
- 571 28. Hocking CM & Price TJ (2014) Panitumumab in the management of patients with  
572 KRAS wild-type metastatic colorectal cancer. *Therapeutic Advances in*  
573 *Gastroenterology* 7(1):20-37.
- 574 29. Huggett JF, Cowen S, & Foy CA (2015) Considerations for Digital PCR as an Accurate  
575 Molecular Diagnostic Tool. *Clin Chem* 61(1):79-88.

- 576 30. Roma C, *et al.* (2013) Detection of EGFR mutations by TaqMan mutation detection  
577 assays powered by competitive allele-specific TaqMan PCR technology. *BioMed*  
578 *research international* 2013:385087.
- 579 31. Giacona MB, *et al.* (1998) Cell-free DNA in human blood plasma: length measurements  
580 in patients with pancreatic cancer and healthy controls. *Pancreas* 17(1):89-97.
- 581 32. Wang BG, *et al.* (2003) Increased plasma DNA integrity in cancer patients. *Cancer*  
582 *research* 63(14):3966-3968.
- 583 33. Devonshire AS, *et al.* (2014) Towards standardisation of cell-free DNA measurement  
584 in plasma: controls for extraction efficiency, fragment size bias and quantification.  
585 *Anal Bioanal Chem* 406(26):6499-6512.
- 586 34. Heredia NJ, *et al.* (2013) Droplet Digital PCR quantitation of HER2 expression in FFPE  
587 breast cancer samples. *Methods* 59(1):S20-23.
- 588 35. Alikian M, *et al.* (2016) Next-Generation Sequencing-Assisted DNA-Based Digital PCR  
589 for a Personalized Approach to the Detection and Quantification of Residual Disease  
590 in Chronic Myeloid Leukemia Patients. *J Mol Diagn* 18(2):176-189.
- 591 36. Corbisier P, *et al.* (2015) DNA copy number concentration measured by digital and  
592 droplet digital quantitative PCR using certified reference materials. *Anal Bioanal*  
593 *Chem* 407(7):1831-1840.
- 594 37. Lievens A, Jacchia S, Kagkli D, Savini C, & Querci M (2016) Measuring Digital PCR  
595 Quality: Performance Parameters and Their Optimization. *PLoS One* 11(5):e0153317.
- 596 38. Whale AS, Huggett JF, & Tzonev S (2016) Fundamentals of multiplexing with digital  
597 PCR. *Biomolecular Detection and Quantification* online advanced publication.

- 598 39. Zheng D, *et al.* (2016) Plasma EGFR T790M ctDNA status is associated with clinical  
599 outcome in advanced NSCLC patients with acquired EGFR-TKI resistance. *Scientific*  
600 *reports* 6:20913.
- 601 40. Oxnard GR, *et al.* (2014) Noninvasive detection of response and resistance in EGFR-  
602 mutant lung cancer using quantitative next-generation genotyping of cell-free plasma  
603 DNA. *Clinical cancer research : an official journal of the American Association for*  
604 *Cancer Research* 20(6):1698-1705.
- 605 41. Sacher AG, Paweletz C, Dahlberg SE, & et al. (2016) Prospective validation of rapid  
606 plasma genotyping for the detection of egfr and kras mutations in advanced lung  
607 cancer. *JAMA oncology* 2(8):1014-1022.
- 608 42. Dhanasekaran S, Doherty TM, & Kenneth J (2010) Comparison of different standards  
609 for real-time PCR-based absolute quantification. *Journal of immunological methods*  
610 354(1-2):34-39.
- 611 43. Devonshire AS, *et al.* (2016) An international comparability study on quantification of  
612 mRNA gene expression ratios: CCQM-P103.1. *Biomolecular Detection and*  
613 *Quantification* 8:15-28.
- 614 44. Dunn OJ (1961) Multiple Comparisons Among Means. *Journal of the American*  
615 *Statistical Association* 56(293):52-64.
- 616 45. Staudte RG & Sheather SJ ( 1990) Robust Estimation and Testing. *Robust Estimation*  
617 *and Testing*, (John Wiley and Sons, New York).

618 **FIGURE LEGENDS**

619 **Figure 1. Inter-laboratory comparison.** The originally submitted values from all twenty-  
620 one laboratories are shown for Samples A-D in descending KRAS G12D copy number  
621 concentration from left to right. For each graph the anonymised laboratory number is  
622 shown in the x-axis with the (A) KRAS G12D or (C) wt copy number concentration  
623 (copies/ $\mu$ L in the reaction) shown on the y-axis as indicated. For the fractional abundance  
624 graphs (B), the %G12D is shown on the y-axis. For each participant, the submitted mean  
625 value is plotted as a short black horizontal line together with the 95% confidence interval  
626 based on triplicate measurements of three units (n=9). The red horizontal dashed line  
627 represents the median value across labs and the red horizontal dotted lines represent the  
628 upper and lower MAD<sub>E</sub> intervals with 99% confidence. For Sample B, the lower confidence  
629 interval is not shown as it is approximately zero. Asterisks (\*) just above the x-axis indicate  
630 laboratories that reported either a zero value or values below the range of the y-axis. All  
631 graphs show two orders of magnitude, shown on the log<sub>10</sub> scale, though the range varies  
632 according to the sample.

633 **Figure 2. Quantification of KRAS G12D following threshold setting guidelines.** For  
634 each sample the comparison between the copy number concentrations originally submitted  
635 (black bar) with the resubmitted values (orange bar) and the coordinator analysis (teal  
636 bar) is shown. The red horizontal dashed line represents the median from the *original* data  
637 set with the associated red horizontal dotted lines representing the upper and lower MAD<sub>E</sub>  
638 intervals with 99% confidence. The scales are the same as those in Figure 1. Four of the  
639 laboratories reanalysed their data (2, 10, 17 and 21) and the remaining three laboratories  
640 were satisfied with their original submission (3, 7 and 16) and so do not contain data  
641 points for resubmission. The coordinating laboratory analysed the data sets from the seven

642 laboratories. The dashed ovals highlight laboratory 17 that were still under-quantifying the  
643 G12D concentration in the four samples compared with the median; while the analysis by  
644 the coordinating laboratory did not.

**Table 1. Values for the *KRAS* target materials obtained during characterisation and inter-laboratory comparison.**

| Material |        | Characterisation |       |                  | Inter-laboratory participant results <sup>#</sup> |                           |                  |              |              |
|----------|--------|------------------|-------|------------------|---------------------------------------------------|---------------------------|------------------|--------------|--------------|
| Name     | Target | Nominal*         | Mean* | U <sub>rel</sub> | Median*                                           | % difference <sup>§</sup> | MAD <sub>E</sub> | Lower 99% CI | Upper 99% CI |
| A        | [WT]   | 2000             | 2400  | 1.0%             | 2267.00                                           | 6%                        | 182.85           | 1795.24      | 2738.76      |
|          | [G12D] | 3                | 4.9   | 5.9%             | 4.74                                              | 3%                        | 0.59             | 3.23         | 6.26         |
|          | % G12D | 0.17             | 0.20  | 6.0%             | 0.21                                              | 5%                        | 0.01             | 0.18         | 0.24         |
| B        | [WT]   | 2000             | 2300  | 1.7%             | 2197.00                                           | 4%                        | 162.31           | 1781.50      | 2612.50      |
|          | [G12D] | 0                | 0.58  | 16%              | 0.42                                              | 28%                       | 0.19             | -0.08        | 0.92         |
|          | % G12D | 0.00             | 0.025 | 16%              | 0.02                                              | 20%                       | 0.01             | 0.00         | 0.04         |
| C        | [WT]   | 2000             | 2300  | 1.4%             | 2273.78                                           | 1%                        | 257.71           | 1608.88      | 2938.68      |
|          | [G12D] | 18               | 22    | 4.5%             | 22.67                                             | 3%                        | 1.78             | 18.08        | 27.26        |
|          | % G12D | 0.90             | 0.96  | 3.5%             | 1.01                                              | 6%                        | 0.05             | 0.89         | 1.14         |
| D        | [WT]   | 1760             | 2100  | 1.5%             | 1975.00                                           | 6%                        | 161.98           | 1557.10      | 2392.90      |
|          | [G12D] | 240              | 310   | 1.6%             | 300.80                                            | 3%                        | 21.55            | 245.19       | 356.41       |
|          | % G12D | 12.00            | 13.00 | 0.92%            | 13.16                                             | 1%                        | 0.15             | 12.79        | 13.54        |
| NEG      | [WT]   | 2000             | 2300  | 1.7%             | 2264.67                                           | 2%                        | 217.51           | 1707.85      | 2821.48      |
|          | [G12D] | 0                | 0.58  | 16%              | 0.49                                              | 16%                       | 0.14             | 0.12         | 0.85         |
|          | % G12D | 0.00             | 0.025 | 16%              | 0.02                                              | 19%                       | 0.01             | -0.01        | 0.05         |
| POS      | [WT]   | 1760             | 2100  | 1.5%             | 1990.00                                           | 5%                        | 139.90           | 1629.07      | 2350.93      |
|          | [G12D] | 240              | 310   | 1.6%             | 294.67                                            | 5%                        | 23.23            | 234.72       | 354.61       |
|          | % G12D | 12.00            | 13.00 | 0.92%            | 13.10                                             | 1%                        | 0.32             | 12.27        | 13.93        |

In order to remain ambiguous to the participants, the sample name (A-D) was randomly assigned to each of the four materials so that there was no correlation between sample name and G12D fractional abundance. The two control materials, NEG and POS, were generated from the sample materials as Sample D and Sample B, respectively and so have identical characterisation values. \*[G12D] and [WT] are given as copies/ $\mu$ L in the reaction based on following the study protocol where 8.8  $\mu$ L of each study material is added to 22  $\mu$ L reaction during set up; this is the metric participants were asked to report. The nominal concentrations are the approximate values the materials were prepared at. For characterisation of the materials, the mean concentration and the relative expanded uncertainty (U<sub>rel</sub>), that is the equivalent of the 95% confidence interval reported as a percentage of the mean, were calculated from the homogeneity study with triplicate measurements (within-unit) from six units (between-units). All values are given to 2 significant figures. #For the inter-laboratory participant results, the values are calculated from the twenty-one original submitted values. §The percentage difference between the mean concentration obtained from the homogeneity study with the participant median value. The MAD<sub>E</sub> is the median absolute deviation.



**Table 2. Precision of the inter-laboratory comparison following resubmission.**

| Material Name | Target | Recalculated Median* | % difference <sup>§</sup> | CV between labs | tCV |
|---------------|--------|----------------------|---------------------------|-----------------|-----|
| A             | [WT]   | 2267.00              | 6%                        | 8.07%           | 1%  |
|               | [G12D] | 4.87                 | 1%                        | 11.39%          | 10% |
|               | % G12D | 0.21                 | 5%                        | 4.22%           |     |
| B             | [WT]   | 2197.00              | 4%                        | 7.39%           | 1%  |
|               | [G12D] | 0.46                 | 21%                       | 34.50%          | 35% |
|               | % G12D | 0.02                 | 20%                       | 37.08%          |     |
| C             | [WT]   | 2274.00              | 1%                        | 11.35%          | 1%  |
|               | [G12D] | 22.98                | 4%                        | 7.87%           | 5%  |
|               | % G12D | 1.02                 | 6%                        | 4.74%           |     |
| D             | [WT]   | 1982.00              | 6%                        | 7.65%           | 1%  |
|               | [G12D] | 303.30               | 2%                        | 5.88%           | 1%  |
|               | % G12D | 13.20                | 2%                        | 1.12%           |     |
| NEG           | [WT]   | 2264.67              | 2%                        | 9.60%           | 1%  |
|               | [G12D] | 0.54                 | 7%                        | 24.72%          | 32% |
|               | % G12D | 0.02                 | 20%                       | 31.26%          |     |
| POS           | [WT]   | 1990.00              | 5%                        | 6.33%           | 1%  |
|               | [G12D] | 298.00               | 4%                        | 7.30%           | 1%  |
|               | % G12D | 13.24                | 2%                        | 2.69%           |     |

\*[G12D] and [WT] are given as copies/ $\mu$ L in the reaction as described in Table 1. The values presented in this table are calculated from the four resubmitted values and remaining seventeen original values. <sup>§</sup>The percentage difference between the mean concentration obtained from the homogeneity study (Table 1) with the recalculated median. The tCV is calculated based on the equation described in Devonshire et al. 2015.

**A**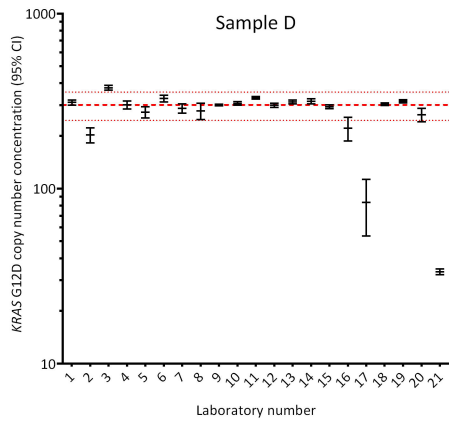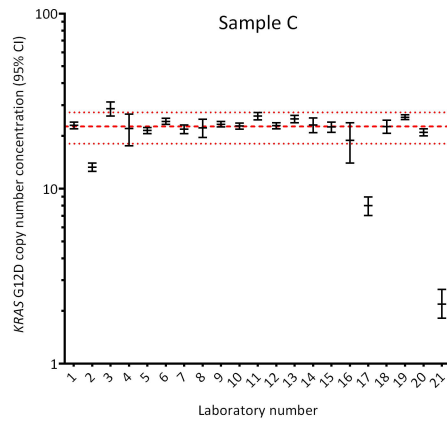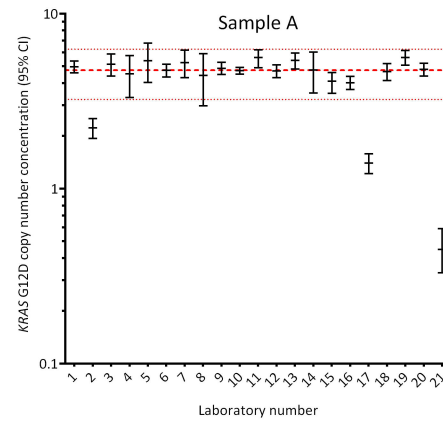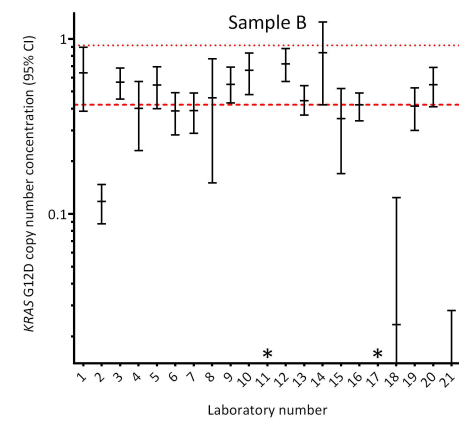**B**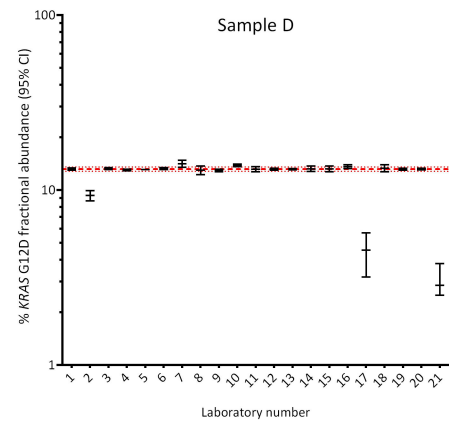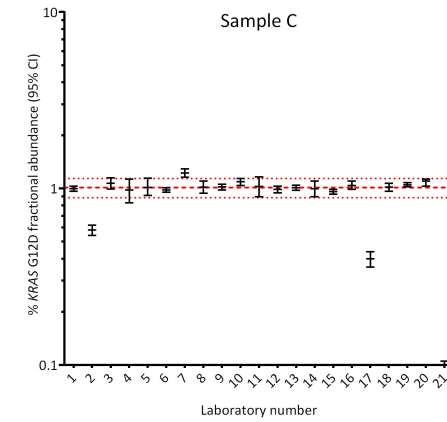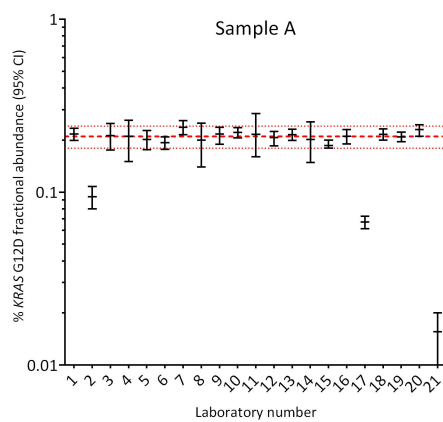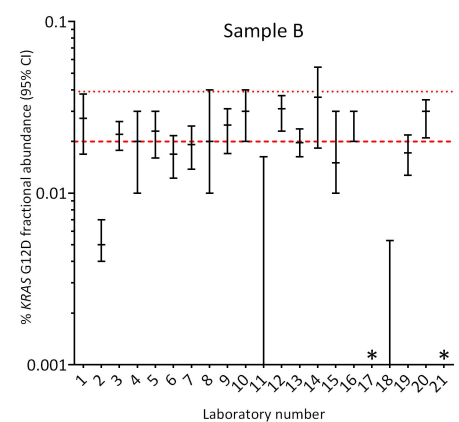**C**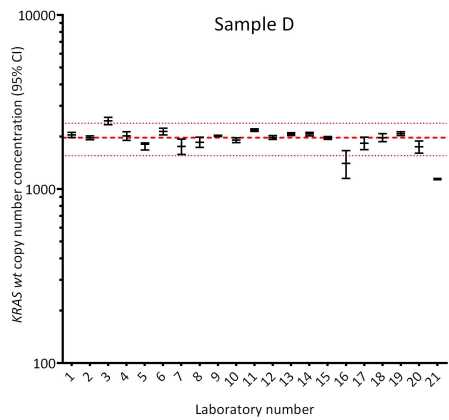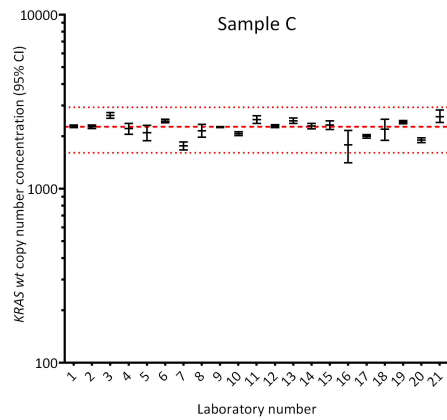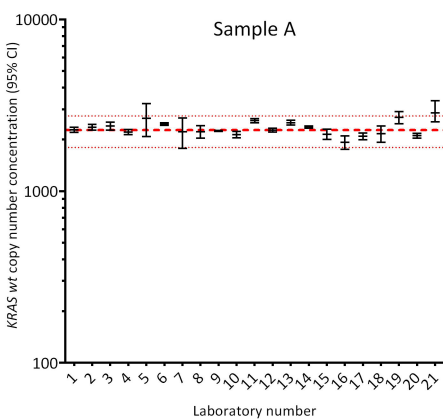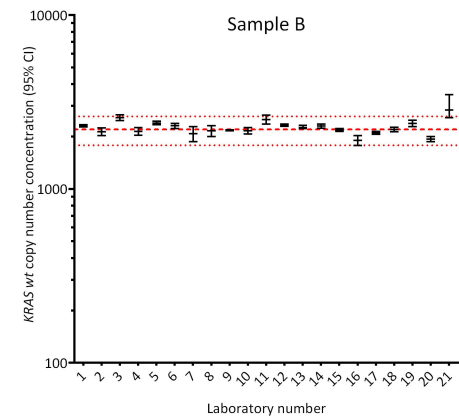

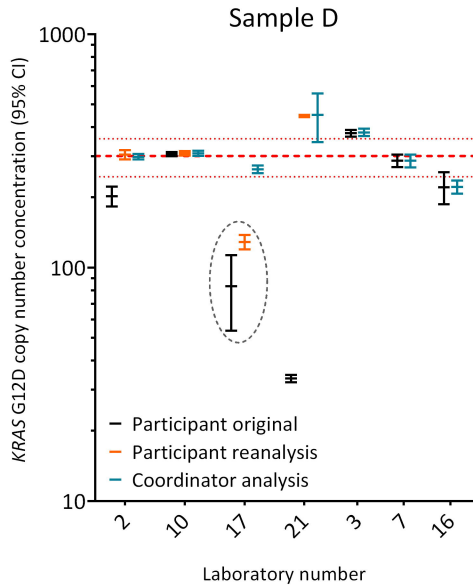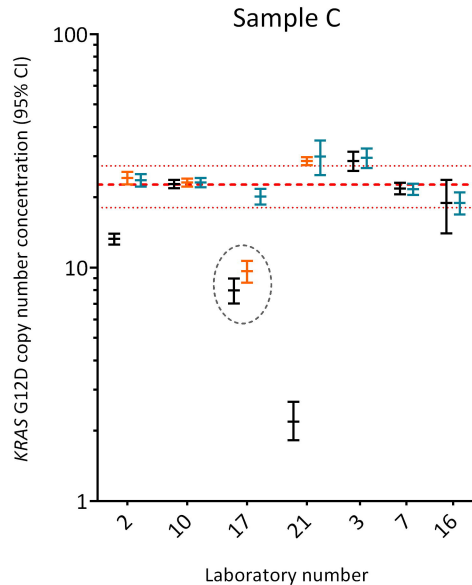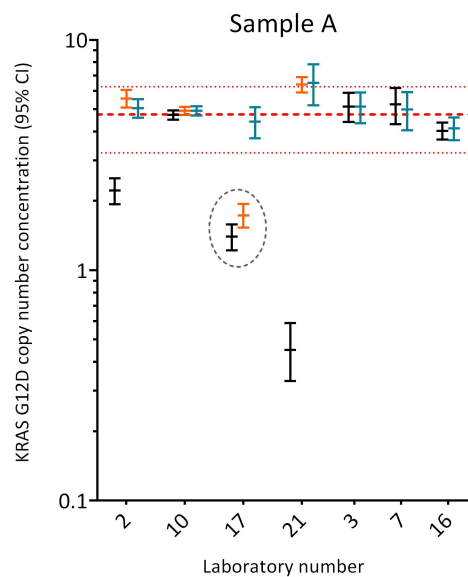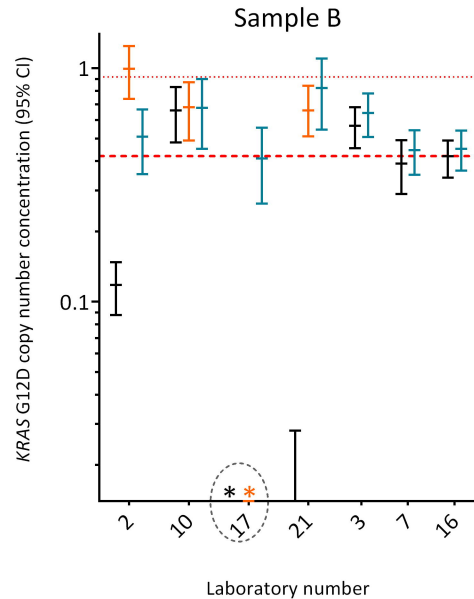

Source: https://www.biorxiv.org/content/10.1101/077917.full.pdf
